# Supplementary material
Source: publisher figshare collection journal article supplement (https://diabetesjournals.figshare.com/articles/dataset/_/19145813)
Supplement: Supplementary file 2 [file 1]

Supplementary Table 1 – Characteristics of SEARCH participants with both etiologic type and genetic risk score data at baseline and follow up visits. Abbreviations: IQR – interquartile range, DAA - diabetes autoantibody, IS – insulin sensitive, IR – insulin resistant, BMI – body mass index, GAD - Glutamic acid decarboxylase-65, IA-2 insulinoma-associated-2, and Zinc transporter 8 (ZnT8), T1D GRS - type 1 diabetes genetic risk score, T2D GRS - type 2 diabetes genetic risk score,

| <b>Baseline visit characteristics</b>                                                          | <b>n</b> | <b>Median (IQR)<br/>or n(%)</b>                  | <b>Range</b>  |
|------------------------------------------------------------------------------------------------|----------|--------------------------------------------------|---------------|
| Provider diabetes type<br>Type 1 diabetes<br>Type 2 diabetes/other                             | 2044     | 1573 (77%)<br>471 (23%)                          |               |
| SEARCH etiologic type<br>DAA+/IS<br>DAA+/IR<br>DAA-/IS<br>DAA-/IR                              | 2045     | 1094 (53%)<br>407 (20%)<br>118 (6%)<br>426 (21%) |               |
| Race/ethnicity<br>Non-Hispanic white<br>Non-Hispanic black<br>Hispanic<br>Other                | 2045     | 1168 (57%)<br>366 (18%)<br>412 (20%)<br>99 (5%)  |               |
| Age of diagnosis (years)                                                                       | 2045     | 11.5 (8.4-14.2)                                  | 0 - 19.7      |
| Diabetes duration @ Visit (years)                                                              | 2045     | 0.8 (0.4-1.3)                                    | 0-12.5        |
| BMI-z                                                                                          | 1991     | 0.89 (0.1-1.8)                                   | -3.6-4.7      |
| Female                                                                                         | 2045     | 50.8%                                            |               |
| HbA1c (%)                                                                                      | 2045     | 7.4 (6.4-8.6)                                    | 3.1 - 16.9    |
| HbA1c (mmol/mol)                                                                               | 2045     | 57 (46-69)                                       | 10 – 161      |
| Fasting glucose (mg/dL)                                                                        | 1672     | 143 (109-208)                                    | 43 - 524      |
| Non-fasting glucose (mg/dL)                                                                    | 78       | 142 (99-212)                                     | 54 - 498      |
| Fasting C-peptide (ng/ml)                                                                      | 1660     | 0.67 (0.30-1.32)                                 | <0.05 - 11.36 |
| Non-fasting C-peptide (ng/ml)                                                                  | 81       | 0.30 (0.20-0.82)                                 | <0.05 – 7.41  |
| GAD autoantibody positive                                                                      | 2044     | 1037 (51%)                                       |               |
| IA2 autoantibody positive                                                                      | 2044     | 1184 (58%)                                       |               |
| ZnT8 autoantibody positive                                                                     | 1497     | 778 (52%)                                        |               |
| Number of Autoantibodies Positive<br>(where all 3 autoantibodies measured)<br>0<br>1<br>2<br>3 | 1496     | 411 (27%)<br>254(17%)<br>405 (27%)<br>426 (28%)  |               |
| T1D GRS (30 SNP)                                                                               | 2035     | 0.271 (0.244-0.294)                              | 0.129-0.340   |
| T1D GRS (67 SNP)                                                                               | 2045     | 12.6 (10.4-14.1)                                 | 4.1-17.5      |

|                   |      |                  |           |
|-------------------|------|------------------|-----------|
| T2D GRS (397 SNP) | 2045 | 11.2 (10.9-11.4) | 10.2-12.3 |
|-------------------|------|------------------|-----------|

|                                        |      |                    |               |
|----------------------------------------|------|--------------------|---------------|
| <b>Follow up visit characteristics</b> |      |                    |               |
| Diabetes duration (years)              | 1410 | 7.9 (6.3-9.4)      | 3.3-13.4      |
| Fasting C-peptide (ng/ml)              | 1307 | <0.05 (<0.05-0.15) | <0.05 - 10.97 |
| Non-fasting C-peptide (ng/ml)          | 33   | <0.05 (<0.05-0.09) | <0.05 – 2.65  |
